# Supplementary material
Source: MDPI journal article supplement (https://www.mdpi.com/2571-9408/7/3/75)
Supplement: s1 [file s1]

# Una arqueta recientemente identificada como *barniz brillante* en Bateman's, la casa de Rudyard Kipling

Ludovico Geminiani <sup>1,2</sup>, Maria Sanchez Carvajal <sup>\*,3</sup>, Emma Schmuecker <sup>3</sup>, Megan Wheeler <sup>3</sup>, Lucia Burgio <sup>2</sup>, Dana Melchar <sup>2</sup>, Valentina Risdonne <sup>\*,2</sup>

<sup>1</sup> Department of Science and High Technology, Università degli Studi dell'Insubria, Via Valleggio 11, 22100 Como, Italy; lgeminiani@uninsubria.it

<sup>2</sup> Conservation Department, Victoria and Albert Museum, Cromwell Road, South Kensington, London SW7 2RL, UK; l.geminiani@vam.ac.uk; l.burgio@vam.ac.uk; d.melchar@vam.ac.uk; v.risdonne@vam.ac.uk

<sup>3</sup> The National Trust, Heelis, Kemble Drive, Swindon, SN2 2NA, UK; maria.sanchez2@nationaltrust.org.uk; Emma.Schmuecker@nationaltrust.org.uk; Megan.Wheeler@nationaltrust.org.uk

\* Correspondence: maria.sanchez2@nationaltrust.org.uk and v.risdonne@vam.ac.uk; Tel.: +441732466228 (MS); - +442079422115 (VR)

**Abstract:** Una arqueta conservada en Bateman's, la casa de Rudyard y Caroline Kipling en Sussex – ahora propiedad del National Trust – fue reconocida recientemente como una obra en *barniz brillante*. Objetos decorados con *barniz brillante*, una técnica caracterizada por el uso de un material indígena americano llamado *mopa-mopa*, son relativamente escasos y rara vez estudiados con métodos de análisis científicos. La colaboración entre el National Trust y el museo Victoria and Albert ha resultado en evidencia científica que será inestimable para el estudio y entendimiento de este tipo de objetos. Los análisis científicos de la arqueta se han realizado exclusivamente de manera no destructiva, para preservar su integridad puesto que el objeto se conserva muy bien. La arqueta de Bateman's se caracteriza por un "dibujo preparatorio" oscuro, hecho con un material q se ve transparente bajo la región infrarroja del espectro electromagnético. La mayoría de las áreas decoradas con hojas de plata se encuentran deterioradas por lo que parecen ser cloruros de plata. Este estudio significa un paso importante hacia el estudio científico comparativo de objetos con barniz brillante en otras colecciones, los cuales a su vez harán posible sugerir una cronología para su manufactura, e incluso identificar talleres de creación.

**Palabras clave:** *mopa mopa*; *barniz de Pasto*; *barniz brillante*; Kipling; arqueta; plata.

## 1. Introducción

El National Trust cuida de propiedades históricas, sitios históricos, la costa y el campo en Inglaterra y Gales, y es la organización sin ánimo de lucro más grande de Europa para la conservación. Las colecciones en el National Trust son muy variadas, y contiene, entre otros, 55,000 piezas de mobiliario y 14,000 piezas adicionales clasificadas como 'objetos de madera'. Tal es así, que es una de las colecciones de muebles y objetos asociados más grande e importante del mundo.

Otros ejemplos estudiados de *barniz de Pasto* [1] publicados por el V&A llevaron a los comisarios de arte del National Trust a buscar este material entre sus colecciones y, en 2021 se identificó el primer ejemplo de barniz de pasto (NT 761758 – Figura 1) en Bateman's cerca de Burwash, Sussex. La arqueta está decorada con *mopa-mopa*, una resina extraída de una planta usada en la creación de objetos en *barniz de Pasto* de América del Sur. Su decoración, cuando incluye pan de plata, se conoce como *barniz brillante* [2,3].

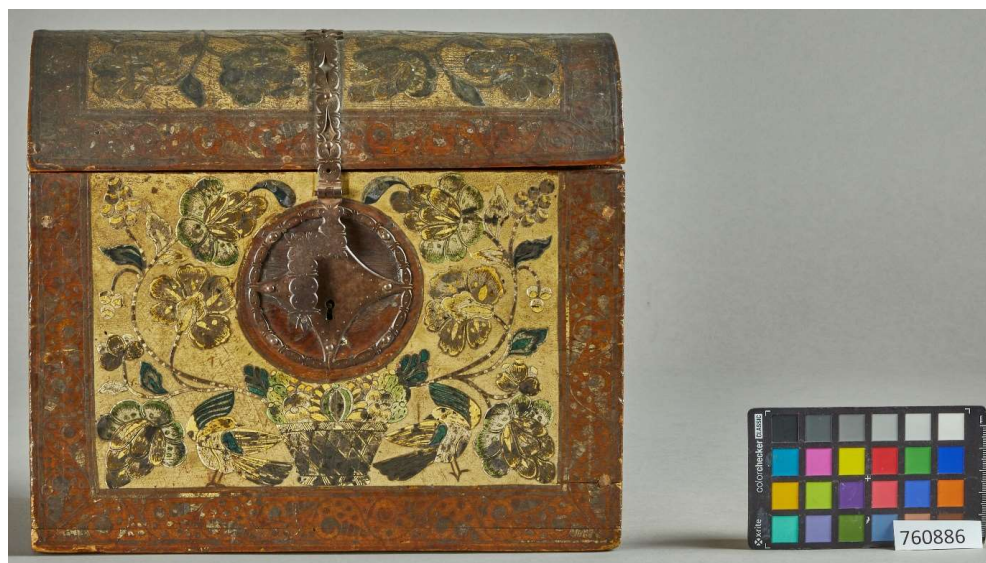

**Figura 1.** NT 761758, arqueta de barniz de Pasto de Bateman's, Sussex, origen: América del Sur, probablemente siglo XVII, (22.6cm x 26.2cm x 13.9cm). © National Trust/Laurence Pordes.

### 1.1. Procedencia

Bateman's (figura 2) fue la casa del novelista, poeta y periodista Rudyard Kipling (1865-1936, figura 3a) y su esposa Caroline 'Carrie' Starr Balestier (1862-1939, figura 3b), desde 1902 hasta que se dejó al cuidado del National Trust en 1939.

Tras la muerte de Caroline en 1939, parte del contenido de la casa pasó en herencia a la hija de los Kipling, Elsie (1892-1976), quien lo trasladó a Wimpole, la casa en Cambridgeshire que compartía con su marido, George Bambridge (1892-1943). La colección que quedó en Bateman's es diversa y comprende muebles, objetos decorativos, libros y textiles de distintos lugares del mundo: algunos heredados, pero sobre todo coleccionados por Rudyard y Caroline en sus viajes frecuentes, a veces extendidos, al extranjero.

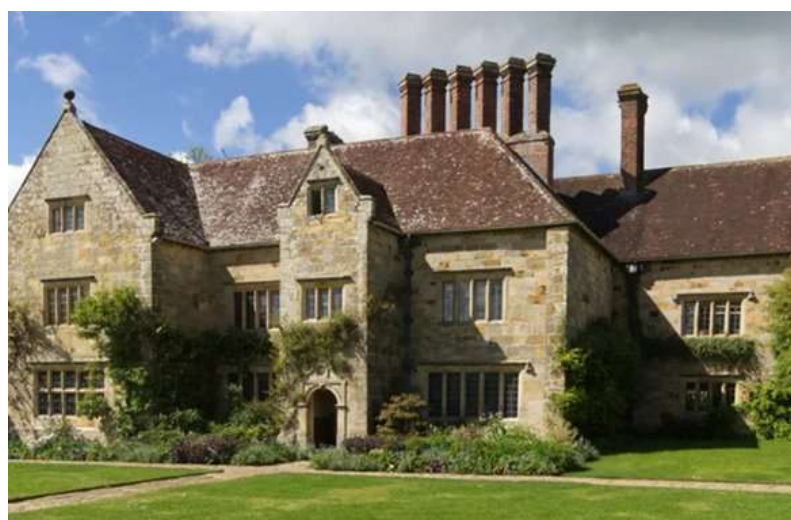

**Figura 2.** Bateman's, cercano a Burwash, Sussex. © National Trust Images/Laurence Perry.

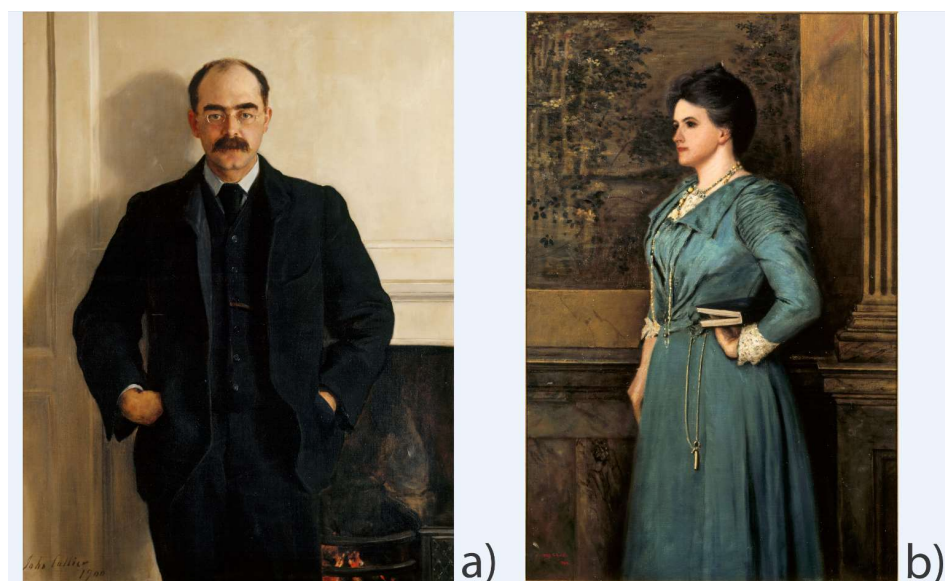

**Figura 3. a)** Rudyard Kipling (1865-1936), por The Hon. Jon Collier (1850-1934), 1900 © National Trust Images/John Hammond y **b)** Caroline Starr Balestier, Sra. de Rudyard Kipling (1862-1939), por Sir Philip Edward Burne-Jones (1861-1926), 1899. © National Trust Images/John Hammond

El contenido de la casa Bateman's fue inventariado a la muerte de Caroline y se hizo una lista separada del legado "schedule", en el que se registra la presencia en el Parlour de 'una arqueta antigua de madera española con tapa abovedada y bisagras, flores de colores pintada y dorada, y sujeta con herrajes y cerradura' [4]. Es casi probable que fuese el objeto NT 761758, pues ha permanecido en el Parlour desde entonces (figura 4); Elsie, a quien correspondía el objeto, no tomó posesión de la arqueta de Bateman's ni se la llevó por razones que se desconocen.

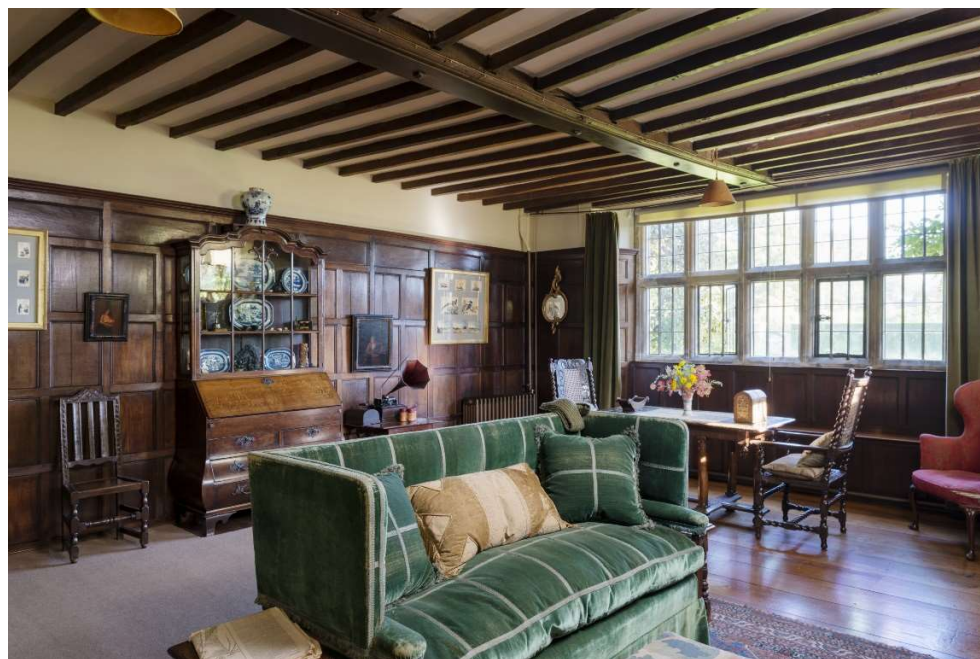

**Figura 4.** El Parlour en Bateman's, hacia 2010, con la arqueta sobre la mesa frente a la ventana. © National Trust Images/Andreas von Einsiedel.

La "Schedule" es el documento más temprano que se conoce sobre la arqueta de Bateman's, y - descrita como española - puede haber influido en la manera en que la arqueta se ha considerado y catalogado en años consecutivos. Las guías del National Trust



de 1976, 1983, 1985, 1989, 1995 y 1996 la describen incorrectamente como una ‘caja enyesada y coloreada’, y en ninguna se le atribuye país de origen ni arriesgan a dar una fecha de cuándo pudo ser hecha [5-9]. El Sistema de gestión de colecciones del National Trust describía hasta hace poco la arqueta como ‘lacada’ y no enyesada, pero omitía también datar o atribuir alguna escuela en particular o país.

No se ha encontrado aún recibo alguno por su compra: aunque la Universidad de Sussex guarda un archivo sustancial de escritos y la correspondencia de los Kipling (junto a otras colecciones más pequeñas por ahí), a él se le conocía como “un empeñado destructor de papeles personales” y su esposa ‘Carrie’ e hija ‘Elsie’ parece ser que tomaron la misma actitud, así que no hay evidencia alguna de cuándo y dónde adquirieron la arqueta [10]. No obstante, todas las guías escritas cuentan lo mismo acerca de cómo la arqueta acabó en Bateman’s, citando que era “muy atesorada por Kipling...(siendo)...un regalo de su hija Elsie, quién la había comprado durante una visita a su prometido en España, el Capitán George Bambridge”. [10] Se desconoce la fuente de esta anécdota: – podría haber sido Elsie Bambridge pues Bateman’s fue transferido al National Trust mientras ella aún vivía, pero luego fue modificada, por lo que se ve en los registros de la arqueta en el Sistema de gestión de Colecciones del Trust) que introduce la idea de que Elsie compró la arqueta para su padre durante su luna de miel en España en 1927. En esta descripción la fecha o el hecho de que Elsie compró la arqueta durante su luna de miel son erróneos, puesto que ella y George se casaron en 1924. De todas formas, algo de cierto debe haber en la idea de que se adquirió en 1927, pues Elsie y George *estaban* en España en ese año: George Bambridge fue un diplomático británico y estuvo destinado en Madrid desde 1925 a 1928.

También cabe señalar que Rudyard y Carrie viajaron a América del Sur -visitando sólo Brasil- en Febrero y Marzo de 1927, el año en que algunas fuentes dicen que se adquirió la caja. Kipling compraba objetos con regularidad en sus viajes y mostró interés en cómo se amueblaba Bateman’s, incluso diseñando la cama de día que aún se conserva en su estudio [11]. Escribió a su hija Elsie el 22-23 de febrero de 1927 desde Brasil, diciendo que Carrie había “salido por ahí” ese día buscando muebles viejos y plata [10]. Sin embargo, no se da ningún detalle más, y una serie de siete cartas de viaje escritas para publicación e impresas en Londres por primera vez en 1927 en *The Morning Post*, y después en una recopilación llamada *Brazilian Sketches* primera edición en 1940, tampoco mencionan la arqueta [12].

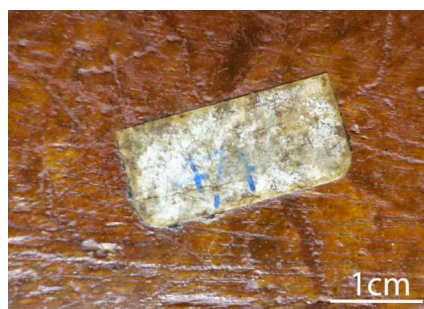

a)

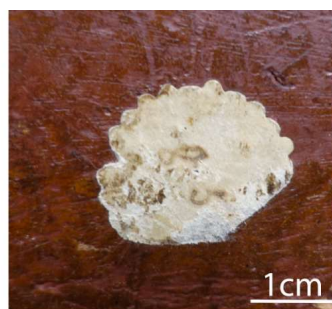

b)

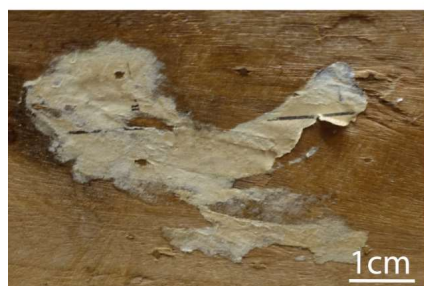

c)

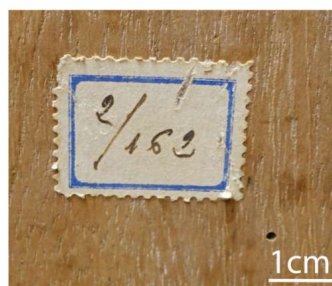

d)

**Figura 5.** Etiquetas de papel que se encontraron debajo (a y b) y en el interior de la caja (c y d), © National Trust/Maria Sanchez

Divorciado de su destino primigenio y con escasas pruebas documentales que describan su llegada a Europa desde Sudamérica, las características físicas son instructivas. Cuatro etiquetas de papel distintas sugieren que la caja ha pasado por diferentes manos (figura 5). La mayoría están desgastadas, pero aun retienen letras o números legibles, aunque su significado no sea aún aparente. Que sepamos, ninguna de estas etiquetas ha sido usadas por el National Trust o los Kipling, y apunta a que pueda haber estado en otra colección o colecciones, o que haya sido manipulada por un anticuario antes de ser adquirida por los Kipling. Sería interesante saber si hay otros objetos de barniz de Pasto que tengan etiquetas parecidas, bien en Suramérica o Europa, en los siglos XIX y XX.

### 1.2. Objetivo de la Investigación

El objeto de este estudio es la investigación de los materiales y las técnicas de construcción de la arqueta. Este será el primer paso hacia futuras investigaciones y colaboraciones centradas en objetos de *barniz brillante*, que a su vez permitirán agrupar objetos similares y sugerir posibles fechas de producción o talleres [13]. Como parte de la investigación sobre la materialidad de la arqueta, el objeto se analizó en el V&A de forma no destructiva y no invasiva mediante reflectografía infrarroja, FRX de barrido y microscopía digital [14]. La toma de muestras no estaba permitida, lo que limitó el alcance de las vías de investigación disponibles. La aplicación de los métodos científicos de análisis elegidos puede complementar los resultados de la observación visual de la arqueta y ampliar nuestros conocimientos sobre su materialidad. La reflectografía infrarroja, en particular, pretendía poner de manifiesto la presencia de posibles dibujos subyacentes o bocetos preparatorios, pero también visualizar cualquier intervención posterior. El escaneado de FRX serviría para evaluar la distribución de los elementos químicos en la superficie de la arqueta, pero también para obtener información sobre la composición de la estructura subyacente. La microscopía digital se eligió porque puede proporcionar un registro en alta resolución de las distintas zonas del cofre, lo que nos permite conocer el estado de las superficies decorativas y es esencial para evaluar las técnicas de artesanía y métodos de construcción del objeto. Cuando el estado de la superficie lo permite, la microscopía digital también contribuiría a comprender mejor la estratigrafía de la arqueta.

La metodología de análisis empleada en esta investigación representa un buen ejemplo de trabajo de forma exclusivamente no invasiva y no destructiva.

## 2. Materiales y Metodología

### Reflectografía de infrarrojos (RI)

La RI se llevó a cabo con una cámara IR Apollo (Opus Instruments, Reino Unido) sensible a las longitudes de onda del IR cercano de 900 a 1700 nm. La cámara está equipada con un sensor de matriz lineal de InGaAs, con un área de 125 × 125 px. Las imágenes se tomaron con una apertura focal de F11 y una distancia focal de 150 mm. Se colocaron dos lámparas de tungsteno simétricamente a ~45° con respecto al eje focal de la cámara. También se utilizaron un filtro de paso de onda corta (SWP) de 1250 nm, un filtro de paso de banda (BP) de 1250-1510 nm y un filtro de paso de onda larga (LWP) de 1510 nm. Las imágenes RIR macro se obtuvieron con un objetivo macro con apertura focal de F4,5.

### Microscopía digital de alta resolución

La microscopía digital se realizó con un microscopio digital de sobremesa Hirox HRX-01 con un accesorio H-1020E. Las imágenes se han obtenido con aumentos de ×10, ×30 o ×90, luz LED anular polarizada y modo de enfoque múltiple. También se utilizó luz rasante. Las imágenes se procesaron con el software HRX-01 y Adobe Photoshop 24.7.0.

### Fluorescencia de rayos X de barrido (FRX)

Las pruebas de FRX se realizaron con un espectrómetro Bruker M6 Jetstream equipado con un tubo de rayos X de micro-focalización Rh-target y dos detectores de deriva de silicio (SDD) XFlash de 60 mm<sup>2</sup>. El tubo de rayos X se utilizó a 50 kV y 600  $\mu$ A. Los mapas de distribución elemental de las zonas de la tabla periódica se recogieron con un tamaño de punto de 100  $\mu$ m, un pulso de 180  $\mu$ m y un tiempo de permanencia de 55-75 ms/píxel. Los espectros de fluorescencia de rayos X se calibraron, ajustaron y procesaron utilizando el software Bruker M6 Jetstream.

### 3. Resultados y deliberación

#### 3.1. Análisis estilístico

La decoración de la caja consiste en un diseño simétrico de flores emanando de una cesta entretejida central con frutas y flanqueada por dos pájaros, todo ello rodeado de un borde de roleos vegetales (figura 1). Por su tipología, su decoración con barniz brillante recuerda más concretamente a un grupo de objetos de barniz de pasto en la colección del V&A como una bandeja o plato bajo (figura 6) datada entre 1650-1750 y atribuida al Vicerreinato de Perú, que está decorada con motivos y paleta de color similares y rodeado de un borde de hojas enroscadas muy parecido.

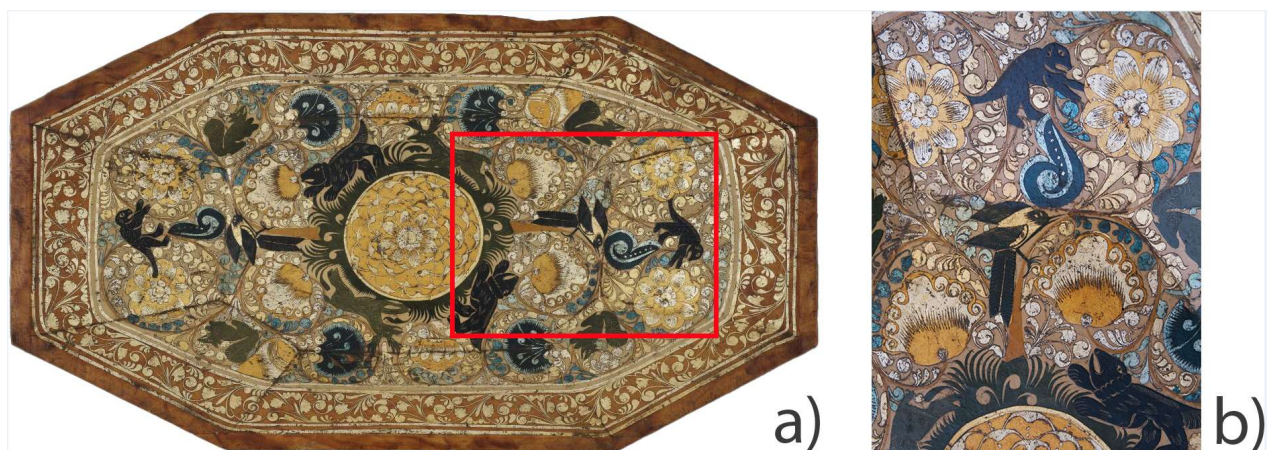

**Figura 6.** **a)** Una bandeja o plato bajo de barniz de Pasto, atribuido al Vicerreinato de Perú, 1650-1750, en la colección del museo Victoria & Albert (número de acceso 1262-1855). **b)** Un detalle de la superficie decorada. ©Victoria and Albert Museum

Estas dos piezas, a su vez, parecen haber sido decoradas de la misma manera que tres cajas-escritorio, dos de ellas en Bogotá en colecciones privadas y la tercera en otra colección privada en Pasto estudiadas por María Cecilia Álvarez-White en una publicación en 2019 [13], y una cuarta caja-escritorio en propiedad de la Hispanic Society Museum and Library, descrita en 2019 en un artículo de Rosa María Creixell Cabeza [14]. Todas ellas presentan una superficie con textura en lugar de una superficie lisa, flores grandes, cestos o macetas y pájaros, y utilizan la misma paleta de color y elementos metálicos. Una de ellas está convenientemente inscrita “Facto in Quito [Ecuador] en 1709”. Aunque aún no se ha establecido un estudio sistemático acerca de donde y cuando se hicieron estas cajas, este último ejemplo sugiere que una fecha provisional hacia 1700 y atribución provisional a Quito, son ambas plausibles.

#### 3.2. Construcción

La arqueta es de construcción sencilla: los laterales de la caja y la tapa están unidos a la parte delantera, trasera y superior con espigas de madera (figura 7). En el interior de la arqueta se aprecian marcas de herramientas relacionadas con la construcción: marcas de



serrucho en el fondo y los laterales, marcas de punzón en los laterales y marcas de gubia en la tapa. La parte delantera está provista de una cerradura (falta la llave) con herraje decorativo, mientras que la tapa tiene un cerrojo decorativo y dos bisagras de hierro ornamentadas en la parte trasera. La identificación de la madera a simple vista es limitada, ya que no hay zonas de la madera de testa sin recubrir. Por la veta tangencial de la madera y el color de la madera expuesta en el interior, las características de la madera son consistentes con el cedro español (*Cedrela odorata*), identificado en otras piezas de barniz de Pasto [2, 17–19]. Para identificar la madera con mayor precisión, sería necesario tomar muestras, pero no se recomienda porque afectaría a la integridad del cofre. El examen de las espigas de madera sugiere que todas están hechas de bambú, ya que el patrón distintivo del bambú de haces vasculares y fibras es fácilmente visible (Figura 7b).

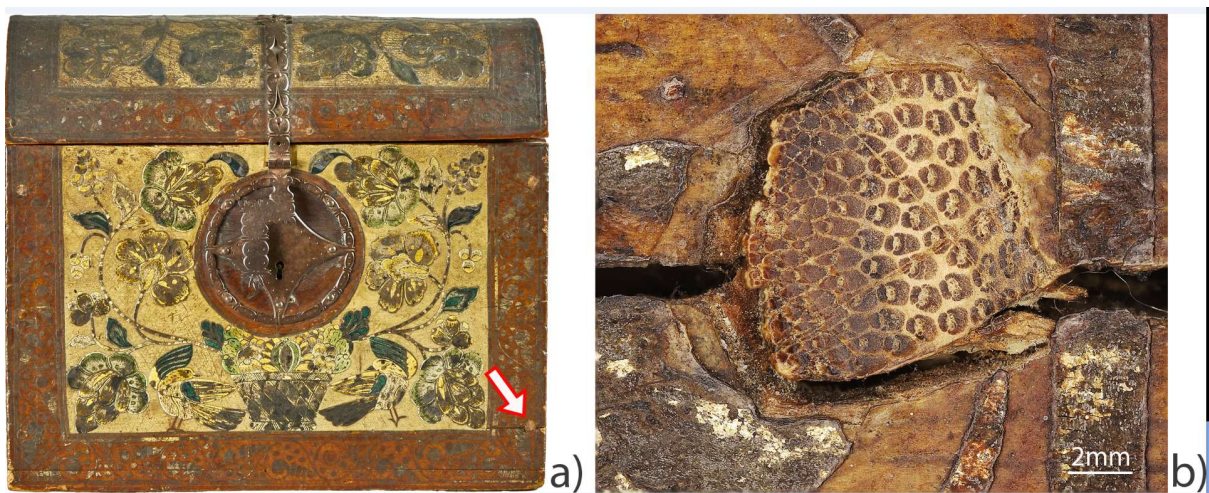

**Figura 7.** a) Parte frontal del cofre; b) detalle de la cabeza de la espiga de bambú.

La estructura de la arqueta es sólida, a pesar de pequeñas grietas relacionadas con la ubicación de las espigas de madera. El cofre también presenta daños causados por carcoma (*Anobium punctatum*), con agujeros visibles en la madera y su correspondiente decoración en superficie.

Las bisagras (figura 8a), la cerradura y cerrojo han sido alterados o sustituidos, como lo demuestran los huecos donde habrían estado las bisagras anteriores. También podemos ver agujeros de clavos anteriores rellenos con madera, y el patrón dejado por estos agujeros de clavos coincide con bisagras de distinta forma. En el interior, en la zona correspondiente a las bisagras exteriores, se han rellenado y rematado con madera dos huecos (figura 8b). En el centro de la tapa se aprecia una marca circular, que podría corresponder a un mecanismo de cierre. Curiosamente, el interior de la arqueta también revela algunos detalles inesperados, como marcas de herramientas (mecánicas) horizontales muy regulares, una pintura rojiza en la parte superior y exterior de los laterales y en las zonas correspondientes de la tapa, así como unos surcos de larvas de carcoma oscurecidos y entreabiertos. Todas estas observaciones sugieren que el interior de la arqueta ha sufrido alguna intervención en el pasado. Las posibles explicaciones de las marcas de herramientas, la pintura y los surcos de carcoma vistos son:

1. en el interior había un revestimiento que se ha retirado y ahora falta;
2. el artesano utilizó madera que anteriormente había sufrido una infestación de carcoma; así, al cortar la madera, quedaron al descubierto antiguos canales de larvas;
3. los laterales se rebajaron después de que la arqueta sufriera una infestación activa de carcoma;
4. las superficies externas y los bordes de los laterales superiores rozaron la cara interna de la tapa, desgastando la capa de *mopa-mopa*.

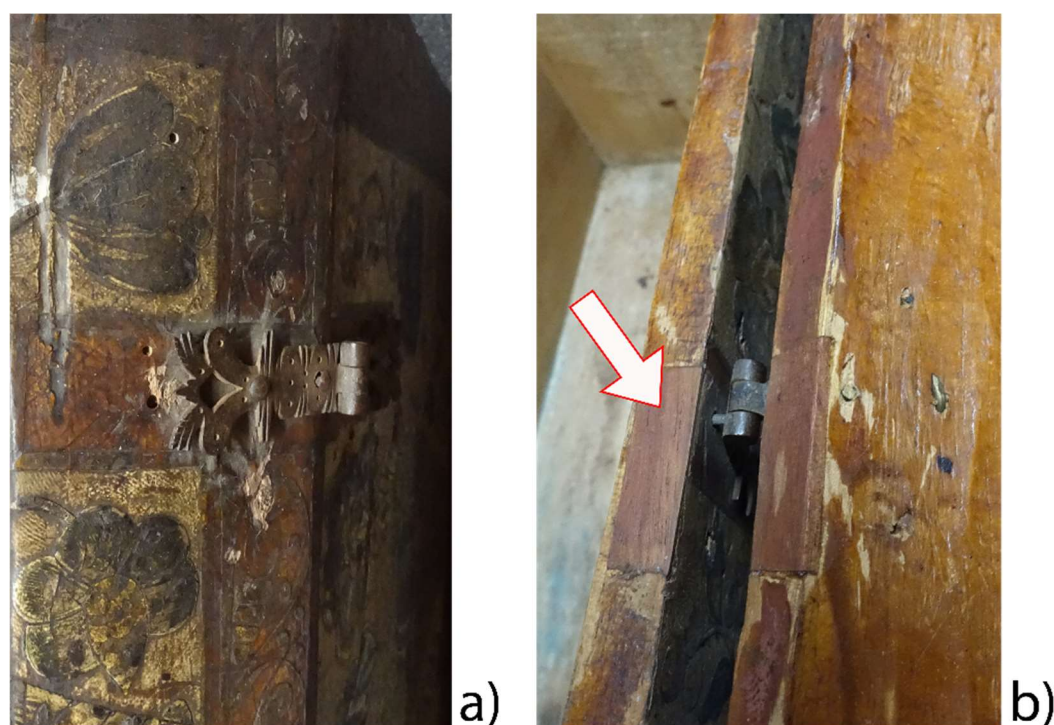

**Figura 8. a)** The hinge on the proper right of the casket; **b)** the altered area where wood fills coincide with both external hinges.

El barrido de FRX se utilizó para investigar y obtener imágenes de la superficie externa del cofre. Aunque el objetivo principal era recopilar mapas de distribución de los elementos de la decoración, también aportó información adicional sobre la estructura interna del objeto.

La figura 9 muestra los mapas de distribución de elementos en la región Compton (la región de alta energía comprendida entre 17 y 40 KeV), lo que permitió observar los materiales que constituyen el cuerpo del cofre y revelar detalles que no son visibles a simple vista. En este caso es posible ver los paneles de madera y cómo están unidos. Se pueden ver claramente los clavos de madera (espigas), así como las marcas dejadas por otros clavos que ya no están presentes. También son visibles los anillos de crecimiento de la madera. Se puede observar que los paneles están cortados en su mayor parte en forma de hendidura o de forma radial, lo que sugiere un cuidadoso trabajo artesanal, ya que la orientación radial de las vetas minimiza el efecto del movimiento de la madera debido a las fluctuaciones de la humedad relativa [20, 21]. La tapa parece haber sido ahuecada a partir de una sola pieza para obtener la curvatura deseada.



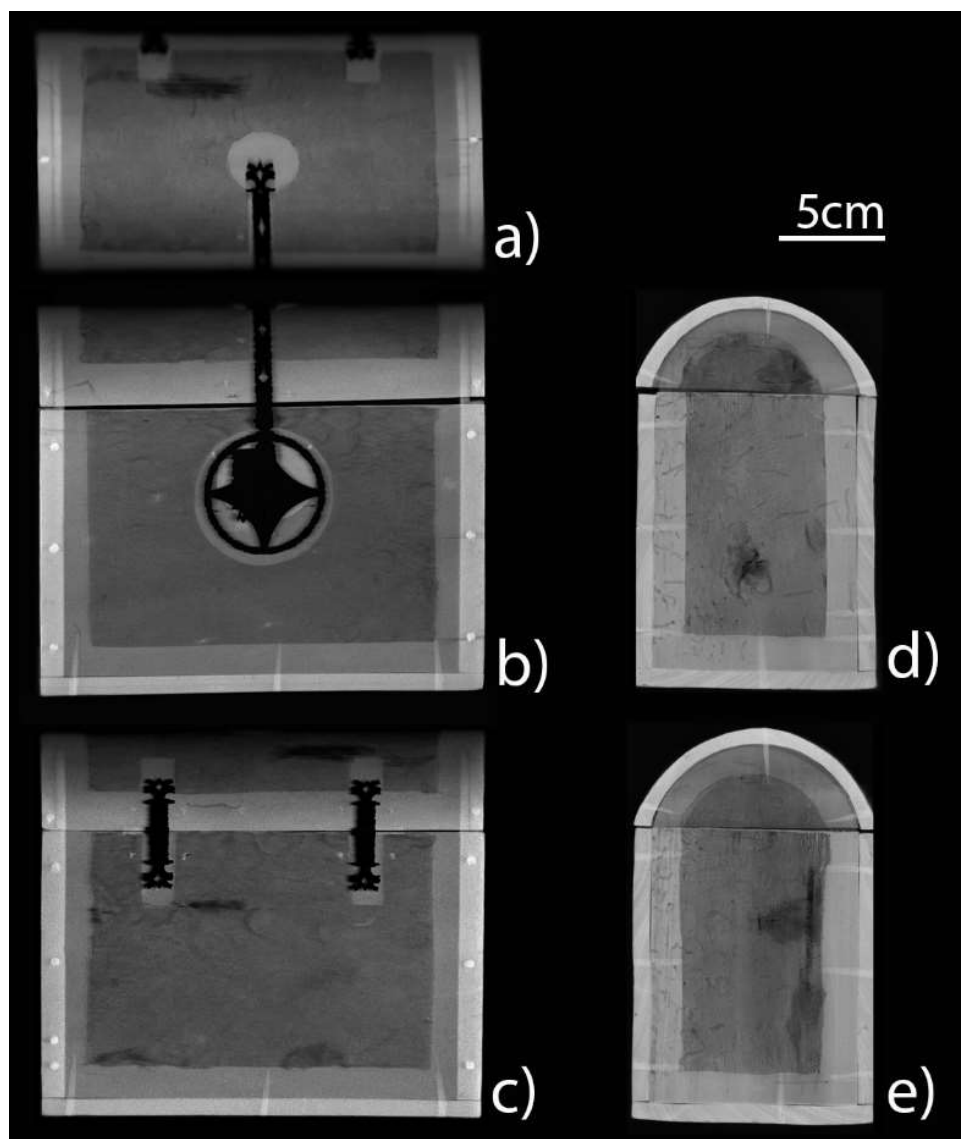

**Figura 9.** Mapas de distribución de barrido de FRX obtenidos en la región de alta energía Compton (17–40 KeV).

Los escaneados por FRX también muestran claramente los daños asociados a la actividad de la carcoma y los túneles resultantes. Por último, se observan las marcas de herramientas dejadas en la cara externa de la madera, antes de la aplicación de los acabados decorativos. El patrón de marcas de rayado en la superficie de la madera tras el montaje de la arqueta sugiere el intento de incrementar la adherencia entre el soporte y los revestimientos decorativos (figura 10).

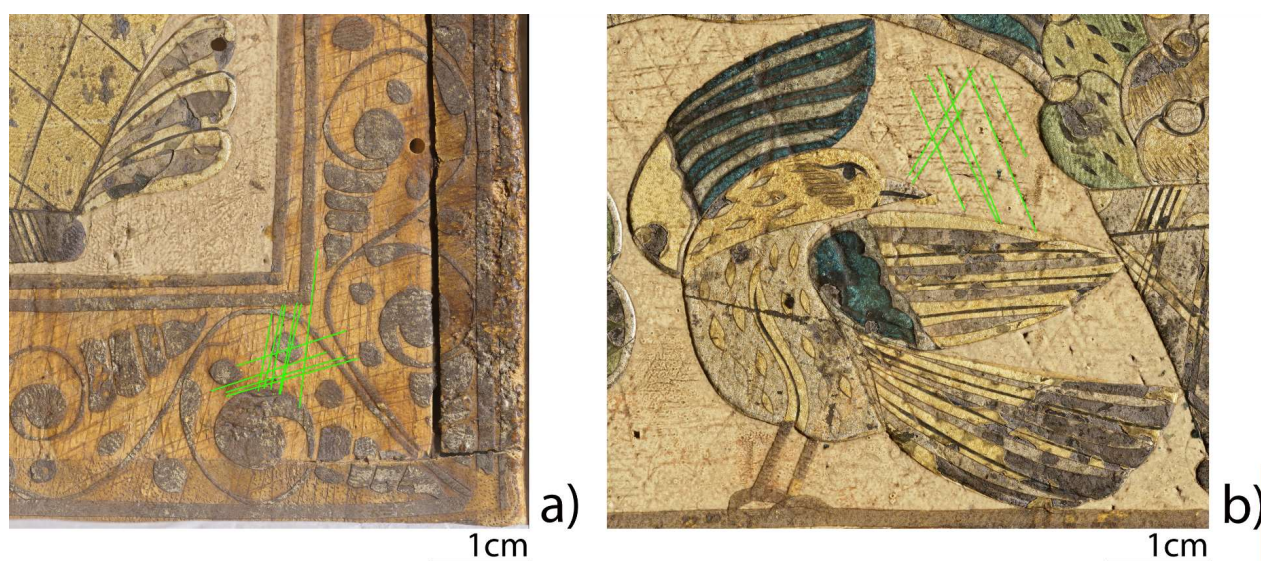

**Figura 10.** Las marcas en la madera de líneas cruzadas se pueden ver con luz rasante: como ejemplo, ver detalle en a) en el propio lado izquierdo de la caja y b) en el frontal

Las marcas en forma de rayado pueden apreciarse a simple vista incluso cuando están cubiertas por varias capas de barniz de Pasto (figura 10). En comparación con ejemplos de otras colecciones, la arqueta se distingue por la profundidad de las marcas: éstas no son tan perceptibles en otros objetos si es que están presentes o, en cambio, tienen marcas de tela en la superficie decorada con *mopa-mopa* [15].

La superficie de la arqueta también conserva marcas de la presión de los dedos y huellas dactilares dejadas por los artesanos al presionar las capas decorativas sobre el sustrato de madera (figura 11).

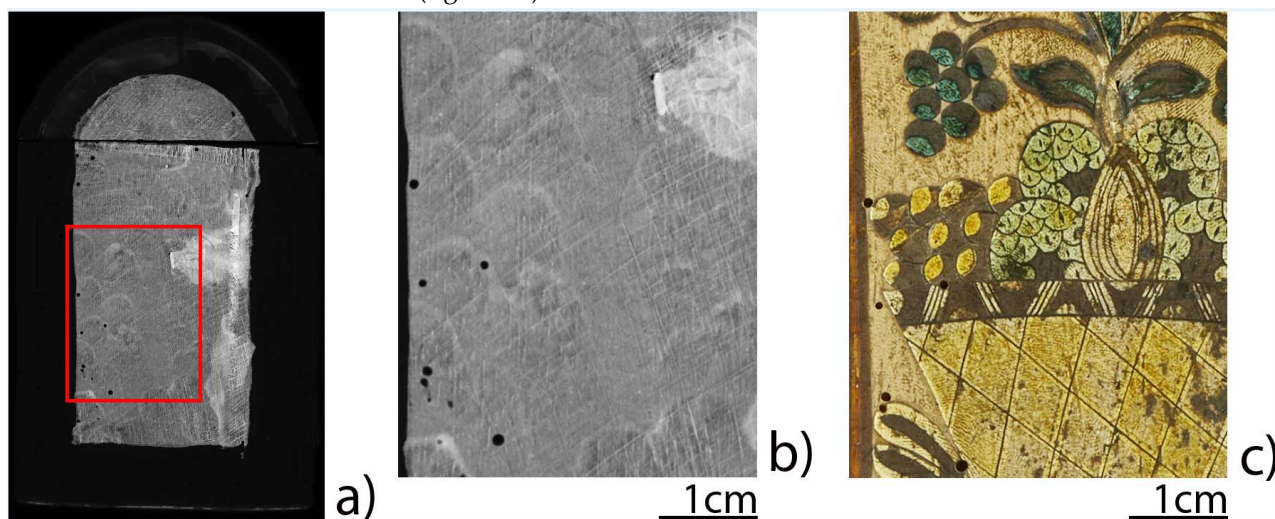

**Figura 11.** Marcas de la presión de los dedos- en manufactura se ven a simple vista mirando detenidamente. Ejemplos del lateral propio derecho del objeto a) Mapa de distribución del elemento plomo con FRX b) detalle del mapa de distribución C) imagen de la misma área con luz normal.

### 3.3. Elementos metálicos

Los herrajes están oxidados, aunque en algunos lugares conservan zonas de superficie brillante, sin pulir. Se planteó la cuestión de si esto último podría deberse a restos de plata, ya que otros objetos de barniz conservan las fijaciones de plata originales. Las investigaciones realizadas con FRX en los componentes externos metálicos confirmaron que éstos son de hierro macizo, sujetos con clavos de latón. También se detectó la presencia de

manganeso, lo cual no es sorprendente ya que el manganeso suele encontrarse en depósitos minerales en combinación con el hierro. No se observaron rastros de plata en la superficie de los herrajes (figura 12).

La valoración de los mapas elementales de cobre y zinc revela que los clavos que actualmente sujetan la cerradura y las bisagras son de latón. Curiosamente, también se observan trazas de clavos de latón anteriores al lado de los actuales, lo que sugiere que los herrajes anteriores también se sujetaban con clavos de latón. La distribución de estos restos indica la forma y el tamaño de los herrajes anteriores (figura 12).

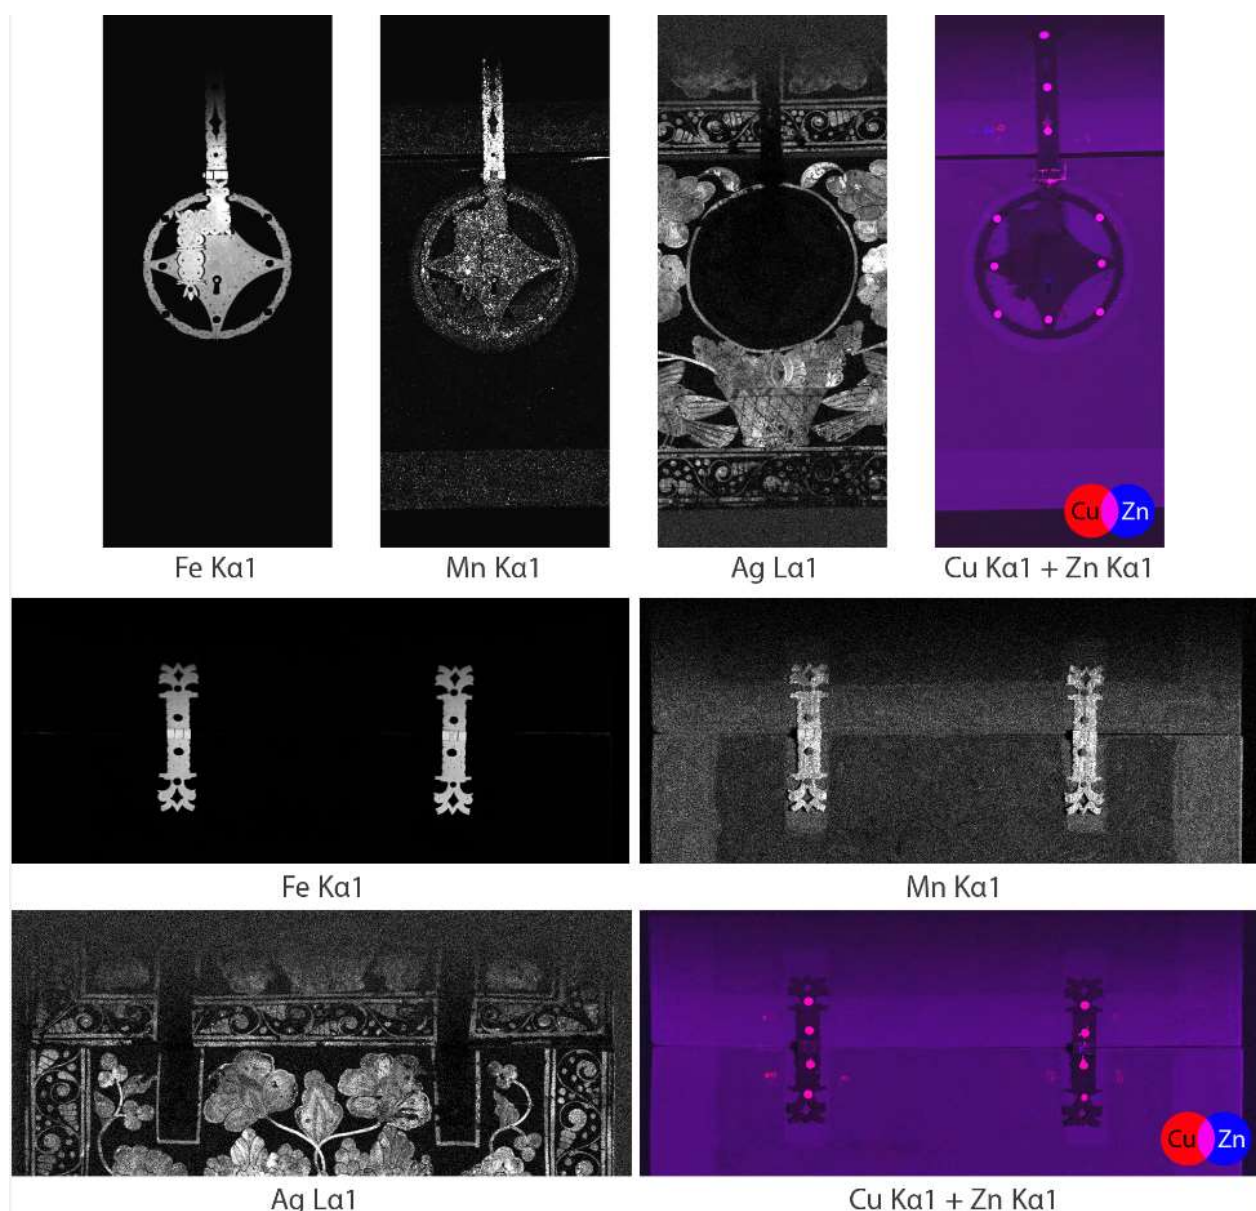

**Figura 12.** Mapas de distribución de FRX del hierro (Fe), manganeso (Mn), plata (Ag) y cobre (Cu) con zinc (Zn). Los mapas de plata confirman que no hay plata en los herrajes metálicos, y los mapas de cobre y zinc muestran que los clavos que sujetan la cerradura y las bisagras son de latón. También se aprecian restos de latón de clavos utilizados para las cerraduras y bisagras previas, lo que sugiere el contorno de herrajes anteriores.

### 3.4. Técnica decorativa

El cofre está decorado con la técnica del barniz brillante, donde las hojas de plata están intercaladas entre capas de mopa mopa, proporcionando un efecto adicional de brillo metálico a la superficie. (Figura 13) [2, 15, 22].



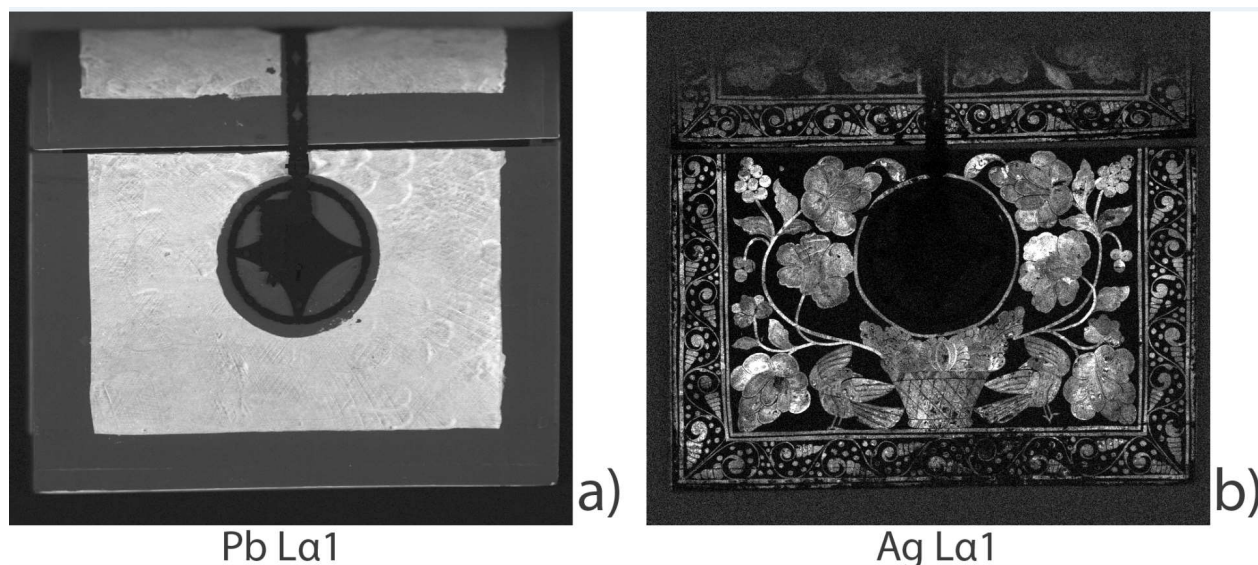

**Figura 13.** Mapas de distribución de plomo (Pb) y plata (Ag) del frontal del cofre.

La estructura de las capas es compleja y varía según qué parte de la arqueta se considere. La capa inicial de *mopa-mopa* que se ve en los bordes, parte del interior y bajo la base de la arqueta es de color rojizo transparente. El centro de los paneles de madera presenta una capa opaca de *mopa-mopa* de color marfil, utilizada como base y fondo para la decoración de barniz brillante. Esta capa tiene una alta concentración de plomo y probablemente fue coloreada con blanco de plomo (albayalde). Ocasionalmente, también se observa una capa oscura que puede describirse como un dibujo preparatorio. El pan de plata se aplicó donde el esquema decorativo lo requería y se cubrió con capas adicionales de *mopa-mopa*. Estas capas protegen la hoja de plata del deterioro, pero también se utilizan con fines decorativos, con algunas zonas coloreadas en diferentes tonos de verde, azul y amarillo para crear una superficie brillante y vibrante. Las capas superpuestas crean un relieve texturizado característico en la superficie.

En ocasiones, la hoja de plata se aplica en forma de mosaico, como se muestra en la Figura 14, donde algunas de las "teselas" de plata aún son visibles, mientras que otras se han perdido o se han deteriorado.

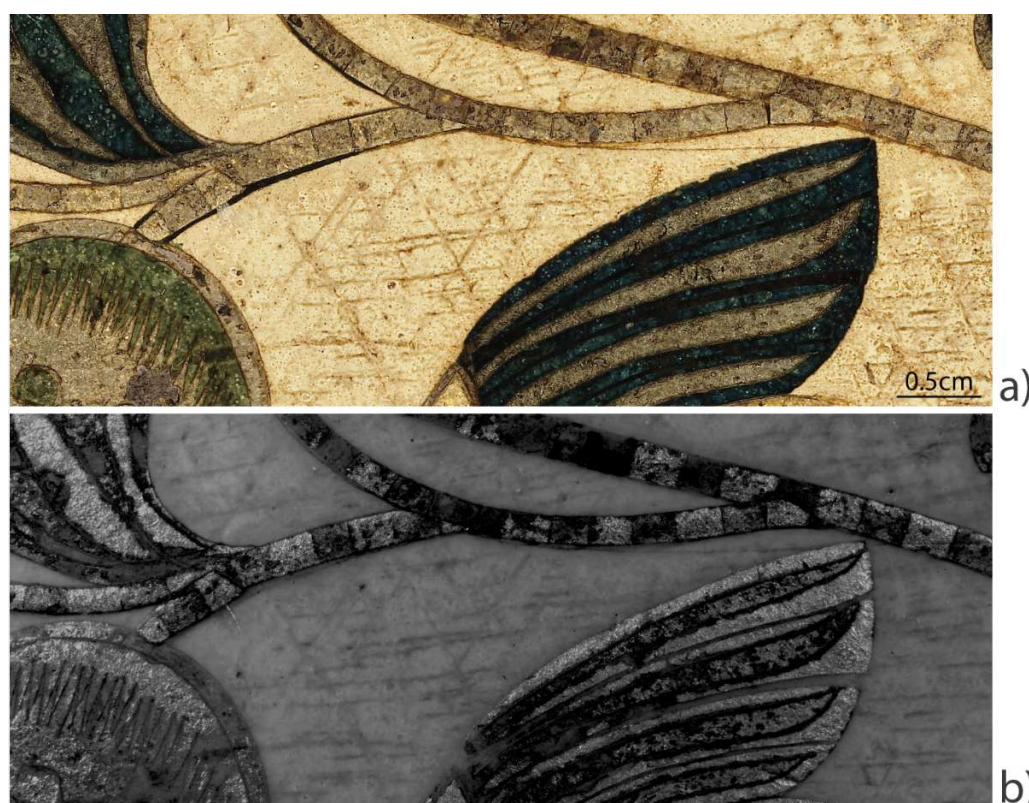

**Figura 14.** Detalle del frontal de la arqueta, donde se muestra un ejemplo de la hoja de plata aplicada en efecto mosaico **a)** con luz visible y **b)** imagen con luz infrarroja.

Si se compara con otros objetos decorados con *mopa-mopa*, parece que las capas decorativas en el cofre de Bateman's son mucho más gruesas, pero esto sólo puede confirmarse con métodos invasivos que no se recomiendan por el momento.

Cabe señalar que la capa que contiene plomo presenta muchas impurezas y pequeñas burbujas (Figura 15), pero a pesar de ello la laca aún permanece bien adherida a la madera. El origen de las burbujas es incierto: podrían deberse a la imperfecta limpieza y preparación de la lámina de *mopa-mopa*, pero también puede deberse a la formación con el tiempo de jabones de plomo, que se sabe que tienen un efecto destabilizador sobre el aspecto y la integridad de las capas con pigmentos de plomo [23-27].

Se ha identificado que los pigmentos blancos de los objetos de barniz de Pasto contenían históricamente blanco de plomo. El blanco de mercurio, es decir, el cloruro de mercurio(I) utilizado como pigmento, sólo se ha identificado recientemente [2, 3, 15, 18, 28-31]. Únicamente uno de los dos objetos decorados con barniz brillante del V&A contenía blanco de mercurio [32], mientras que la bandeja mostrada en la figura 6 no contenía ninguno. En ninguna parte de la arqueta del National Trust se ha detectado mercurio, siendo su presencia o ausencia una de las cuestiones a investigar durante este estudio.

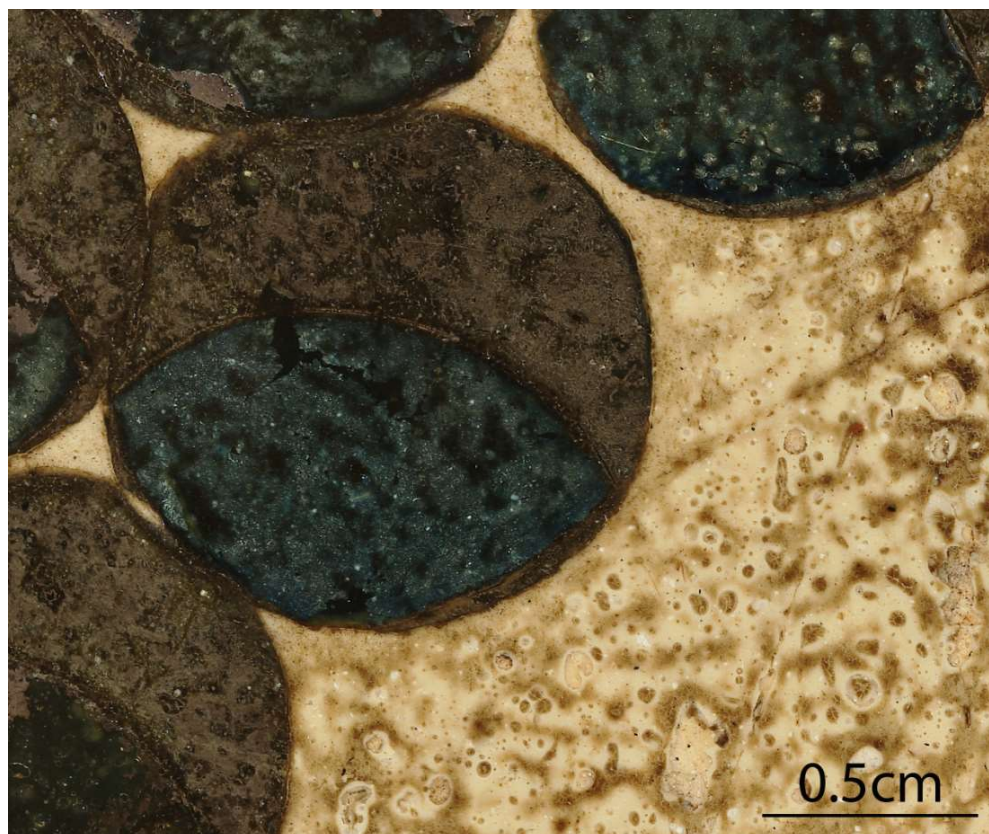

**Figura 15.** Detalle del lado propiamente izquierdo de la arqueta muestra las burbujas e impurezas en el barniz que sirve como fondo.

### 3.5. *Capa subyacente y contornos*

El examen técnico del objeto reveló también que se utilizaba un material de color oscuro con dos fines distintos: en primer lugar, servía para fines preparatorios, ya fuera como dibujo base o como soporte de calcado para reproducir motivos estándar de ornamentación; en segundo lugar, se utilizaba también como color de contraste para ser descubierto después como parte del esquema decorativo. Bajo la luz visible, este material es negro o azul muy oscuro, pero es invisible bajo la luz infrarroja, lo que sugiere que podría estar hecho con índigo [29, 31, 33].

La figura 16a muestra un detalle de la arqueta visto bajo luz rasante, que revela cómo se aplicó la decoración sobre el fondo de blanco de plomo. Partes del dibujo preparatorio se muestran con luz visible bajo la hoja metálica, donde ésta se ha perdido (figura 16b), pero se vuelven transparentes cuando se observan con luz infrarroja (figura 16c).



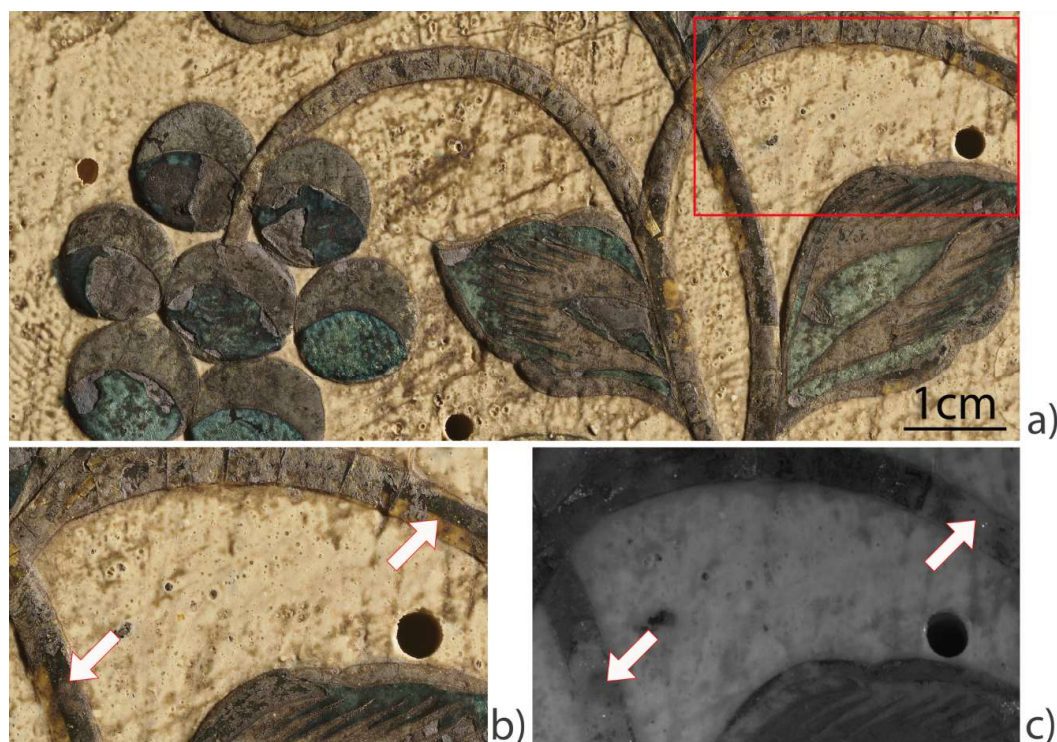

**Figura 16.** Detalles de la parte izquierda del cofre que muestran rastros de una capa oscura de dibujo preparatorio inferior que es invisible bajo luz infrarroja (RI). a) imagen visible con luz rasante; b) imagen del detalle con luz visible; c) imagen del detalle bajo luz infrarroja. Las flechas blancas señalan las zonas en las que se aprecia el dibujo subyacente.

En la figura 17 se muestra otra zona en la que se ha perdido una gran cantidad de la hoja de plata, dejando al descubierto la capa de color oscuro que hay debajo. Cerca de allí, el material oscuro también se aprecia claramente, esta vez como parte integrante del diseño, donde se han recortado intencionadamente hendiduras en el pan de plata. En ambos casos, el material oscuro es transparente en la reflectografía infrarroja. La figura 18 muestra otro caso de recorte intencionado del pan de plata, que deja al descubierto la capa oscura subyacente.

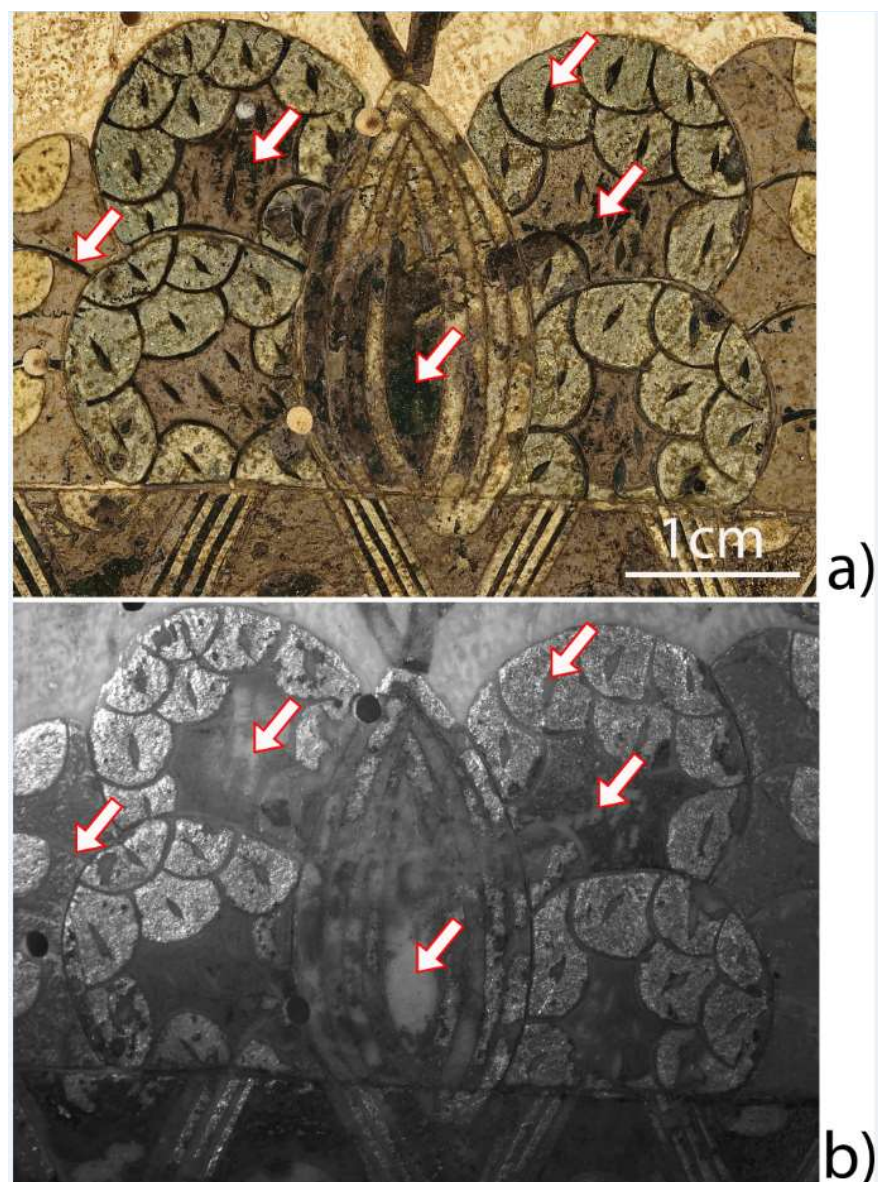

**Figura 17.** Detalle del lado izquierdo propio del cofre. **a)** con luz visible y **b)** con luz infrarroja, ambas mostrando un detalle de la capa inferior oscura bajo la hoja de plata

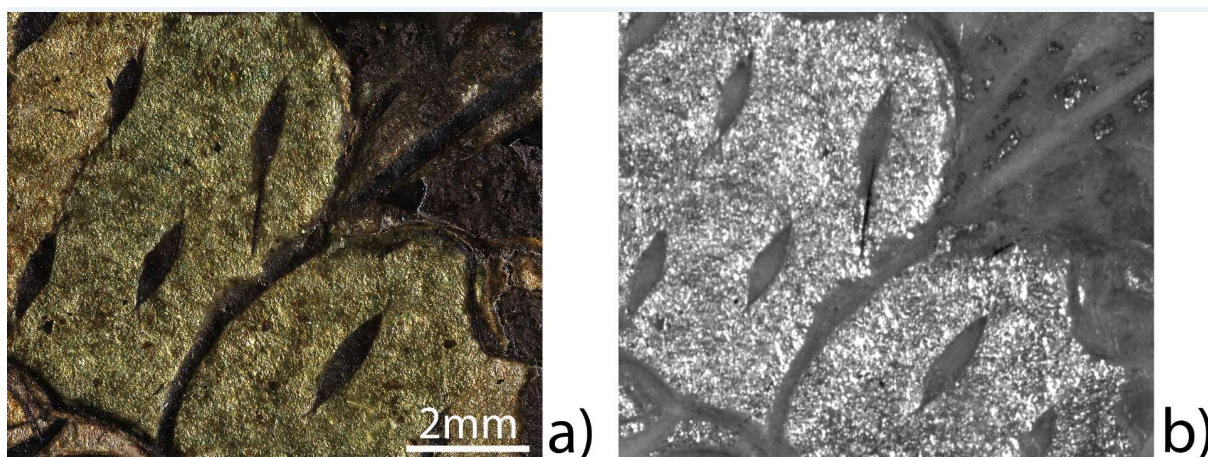

**Figura 18.** **a)** Detalle del frontal de la caja vista con luz rasante, mostrando los cortes deliberados en la hoja de plata para revelar la capa oscura de debajo. **b)** Véase como el material de la capa oscura aquí se vuelve transparente bajo la luz infrarroja.



El artista también utilizó un método alternativo para realzar el contorno de algunos de los detalles de la arqueta, como se muestra en la figura 19. Las líneas marcadas con flechas rojas se refieren a detalles oscuros tanto bajo iluminación visible (figura 19a) como infrarroja (figura 19b). Las líneas marcadas con flechas blancas se refieren a detalles que son oscuros tanto bajo la luz visible (figura 19a) como bajo la infrarroja (figura 19b), lo que sugiere que probablemente contienen negro de carbón finamente molido y aplicado sobre las incisiones de las capas de *mopa-mopa*.

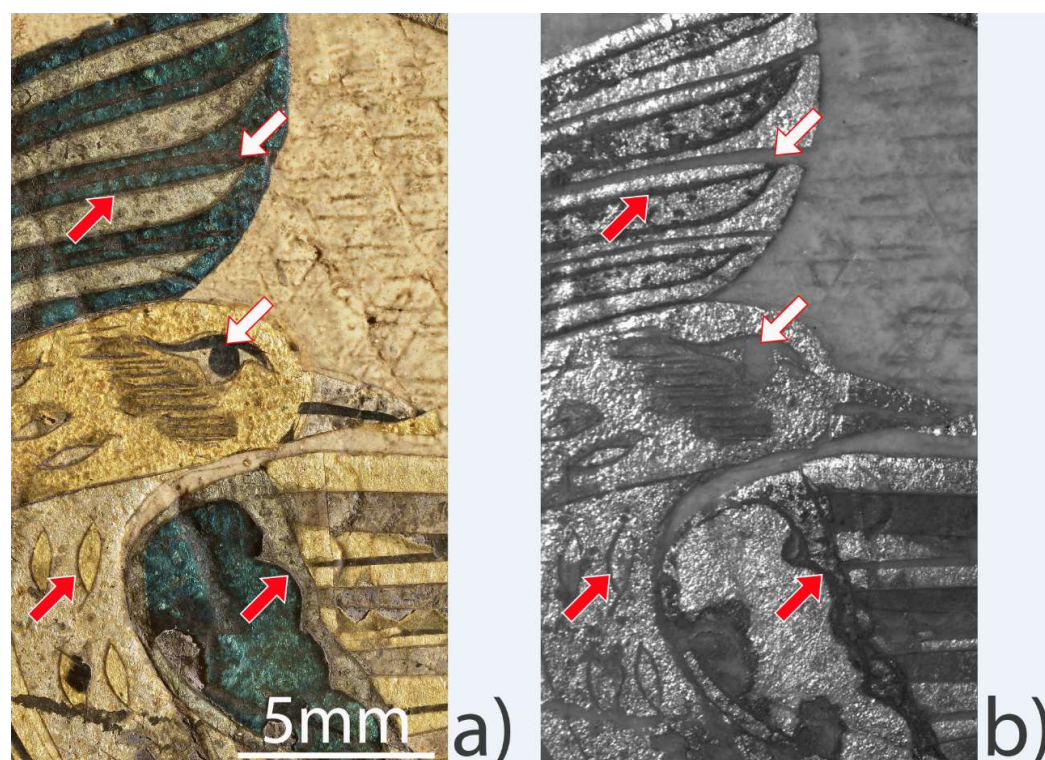

**Figura 19.** Detalle de la parte frontal del cofre, bajo luz visible (a) y reflectografía infrarroja (b). Obsérvese cómo el ojo del pájaro y la coloración interior del ala se vuelven transparentes bajo reflectografía infrarroja (flechas blancas), mientras que los contornos del ala y las incisiones de la mejilla del pájaro permanecen visibles en ambas condiciones de iluminación (flechas rojas).

### 3.6. Estructura de las capas de decoración

Una inspección visual cuidadosa de la decoración y sus alteraciones permite dilucidar cuál pudo ser la estructura original de las capas (figura 20).

En los casos en que la capa 5 permanece intacta, la hoja de plata que hay debajo mantiene su aspecto brillante debido a la presencia de *mopa-mopa*, que cubre y protege del deslustre la plata que hay debajo. Esto puede verse claramente no sólo bajo la luz visible y a simple vista, sino también en las imágenes de reflectografía infrarroja, donde el metal sin deteriorar aparece brillante y blanco, y la hoja deslustrada aparece gris.

Los mapas de los elementos del cofre obtenidos por FRX muestran que el cloro está asociado a la hoja de plata deslustrada (véanse las figura 21b y figura 21c).



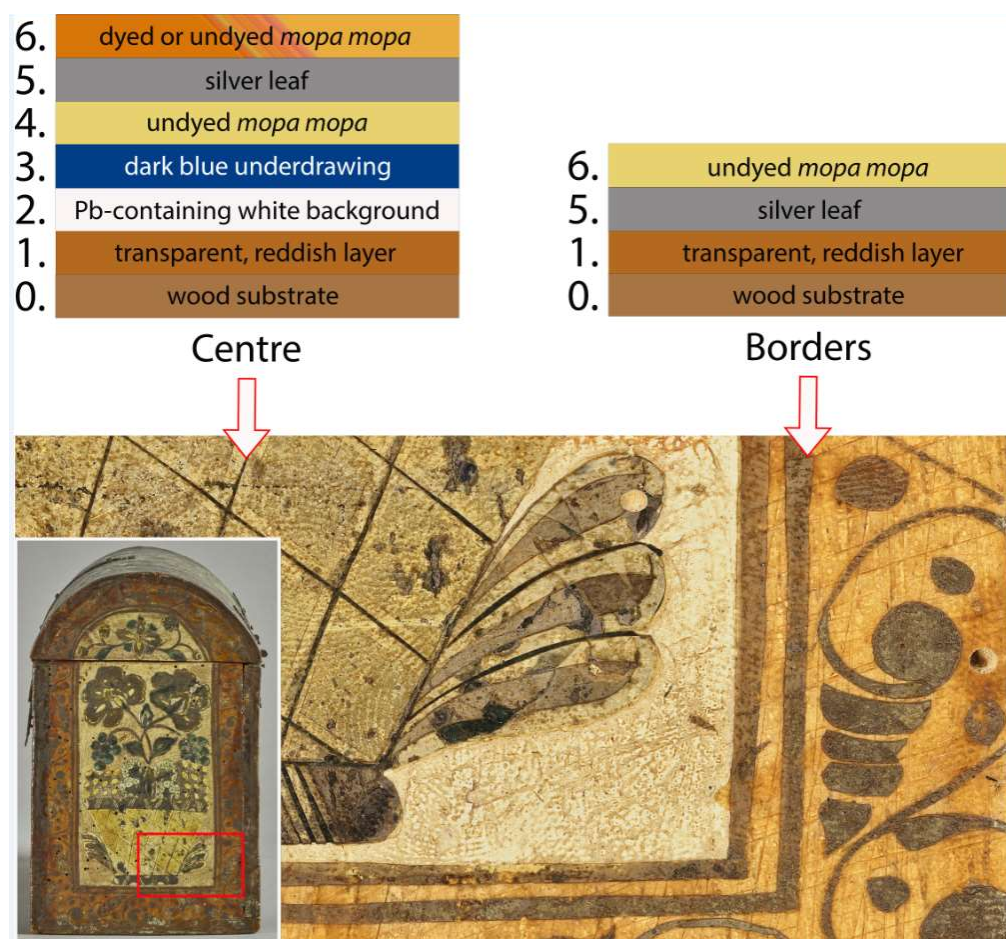

**Figura 20.** Estratigrafía simplificada del centro y el borde de la arqueta (arriba) y primer plano del lado izquierdo propiamente dicho de la arqueta, mostrando algunas de las capas decorativas.

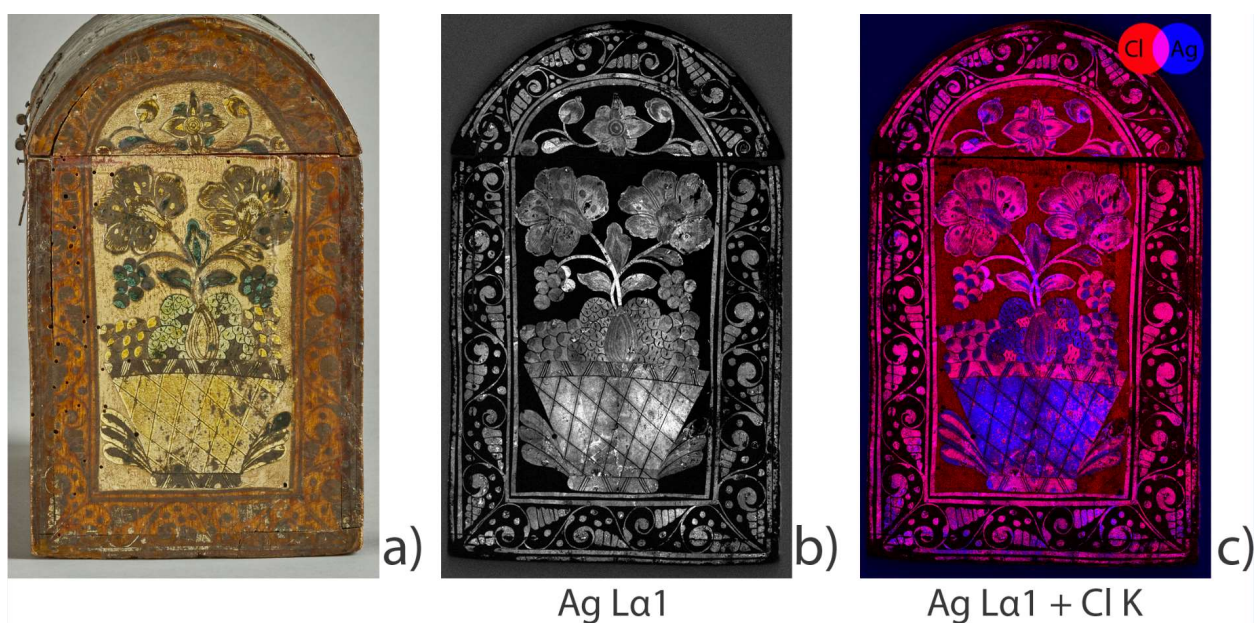

**Figura 21.** Lado propiamente izquierdo del cofre **a)** bajo luz visible; **b)** mapa de distribución del elemento plata (Ag) por FRX; **c)** mapas de distribución de los elementos de plata (Ag) y cloro (Cl) por FRX.



Se puede conjeturar que la arqueta estuvo expuesta a algún material utilizado como tratamiento contra infestaciones que contenía cloro. Esto explicaría la asociación de plata y cloro en las zonas deterioradas de la decoración [34,35].<sup>1</sup> Lo que resulta inesperado es que no haya azufre asociado a la oxidación de plata, ya que el sulfuro de plata suele ser el producto más común de la corrosión de la plata (más adelante se tratará este tema). Mientras que el cloruro de plata se ha encontrado en otros ejemplos analizados en todo el mundo, lo que lo hace único a este ejemplo es que no hay indicios de sulfuro de plata [34].

En la figura 22 se muestra un primer plano del borde decorado. En la superficie se identificó un material que contenía calcio (probablemente yeso, como demuestra la estrecha correspondencia entre los mapas de calcio y azufre). Las volutas están claramente realizadas con pan de plata. Los mapas de elementos muestran una superposición perfecta de plata y cloro, como se observa en otras zonas de plata degradada, pero no se aprecia ninguna coincidencia con el azufre.

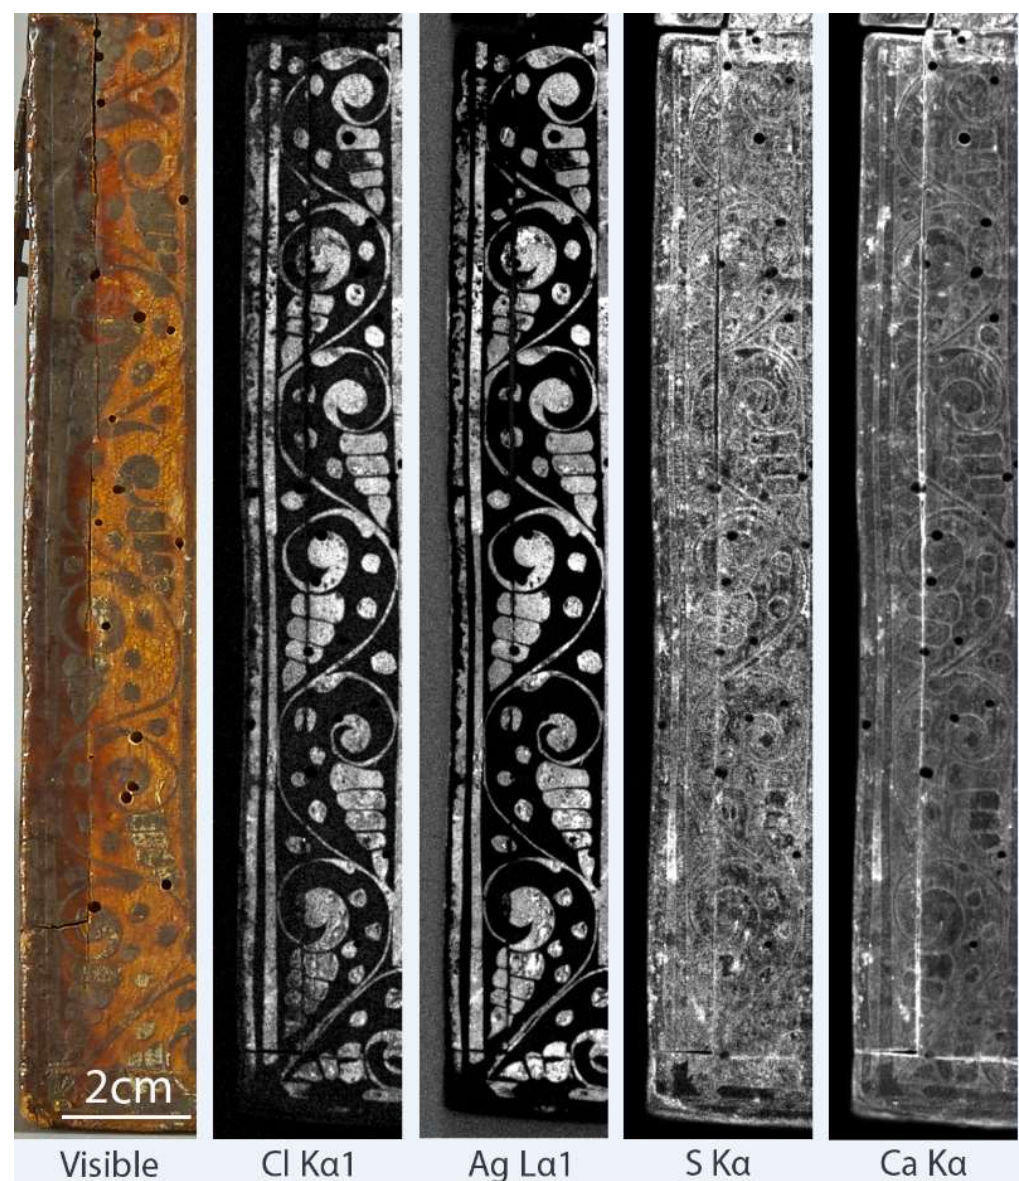

**Figura 22.** Mapas de distribución elemental por FRX del cloro (Cl), la plata (Ag), el azufre (S) y el calcio (Ca), mostrados con la correspondiente imagen visible del lado derecho propiamente dicho del cofre.

### 3.7. Tratamientos pesticidas

En la parte inferior de la arqueta se pueden distinguir tres agujeros de carcoma, dos de ellos rellenos. Es significativo que muchos otros orificios de insectos en el cofre no muestren ningún signo de haberse relleno en el pasado, lo que sugiere que hubo al menos dos, si no más, ocasiones de ataque de carcoma. Así pues, podemos imaginar que cuando la madera fue atacada por primera vez por la carcoma fue tratada con una solución acuosa de sales de cobre (Figura 23). El tratamiento se aplicó en toda la superficie y, en particular, donde habían aparecido los tres agujeros, de modo que el líquido penetró en la madera siguiendo la veta. Esto puede verse en el mapa de distribución del cobre. A continuación, se cubrieron los agujeros durante el proceso decorativo. Las sales de cobre se utilizaban como biocidas desde la antigüedad [35]. Una hipótesis atractiva podría ser la de correlacionar la presencia del cobre con el fenómeno de corrosión de la plata.

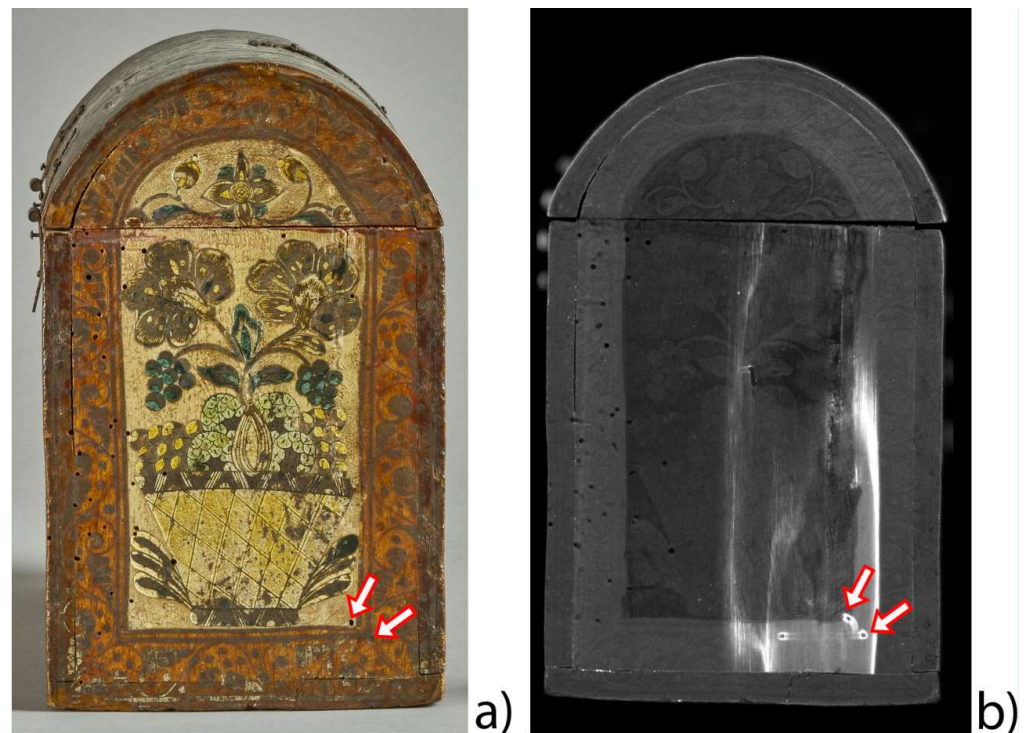

**Figura 23. a)** Imagen visible del lado izquierdo propiamente dicho del cofre. **b)** Mapa de distribución elemental de cobre (Cu) por FRX de barrido del cofre, misma área.

#### 4. Conclusiones

El redescubrimiento de esta arqueta en la colección del National Trust como objeto de barniz brillante, tras una reciente oleada de actividades de investigación sobre la laca indígena americana, ha sacado a este objeto de su anterior "penumbra" y ha planteado la oportunidad de nuevas narrativas en Bateman's. El trabajo sobre esta arqueta aún está en curso y hay aspectos interesantes como las etiquetas incompletas y los signos de alteración de los herrajes metálicos, que deben investigarse más a fondo.

Los análisis científicos de la arqueta se llevaron a cabo exclusivamente de forma no destructiva y no invasiva, para preservar la integridad del objeto, que se encuentra en muy buenas condiciones. Revelamos una gran cantidad de información y pruebas que contribuyen al creciente acervo de conocimientos sobre este tema. Los aspectos más curiosos revelados por el análisis científico de este objeto incluyen la presencia de un dibujo preparatorio/capa preparatoria, probablemente calcado y coloreado con índigo, así como el uso de incisiones y recortes en la plata para revelar una capa oscura subyacente.

La presencia de cloro en todas las zonas de plata deslustrada se ha atribuido a la formación de cloruro de plata.

No se detectó blanco de mercurio en esta arqueta.



También será necesario considerar una comparación detallada con objetos similares en otras colecciones, con el fin de establecer una cronología más completa de la técnica del *barniz brillante*.

**Materiales complementarios:** La siguiente información complementaria puede descargarse en: XXX, Material suplementario S1: texto en español.

**Contribuciones por autor:** Conceptualización, L.B, D.M., V.R, M.S.C., E.S. y M.W.; metodología, L.B, V.R, M.S.C., E.S. y M.W.; análisis formal, L.G. y V.R.; investigación, L.G., L.B., D.M., V.R., M.S.C., E.S. y M.W.; conservación de datos, L.G. y V.R.; redacción: preparación del borrador original, L.G., M.S.C., E.S., M.W., L.B., D.M., V.R.; redacción: revisión y edición, L.G., M.S.C., E.S., M.W., L.B., D.M., V.R. Traducción al español: M.S.C. Todos los autores han leído y aceptado la versión publicada del manuscrito.

**Financiación:** Esta investigación no ha recibido financiación externa.

**Declaración de disponibilidad de datos:** Datos originales disponibles previa solicitud, cuando esté suficientemente justificado.

**Agradecimientos:** Los autores desean agradecer la ayuda de la Royal Oak Foundation por hacer posible la conservación de esta arqueta; a Nick Humphrey (conservador de mobiliario y carpintería del V&A) y a María Cecilia Álvarez-White por dedicarnos generosamente su tiempo y compartir sus conocimientos mientras desarrollábamos nuestro plan de investigación, análisis y conservación.

Agradecemos al UKRI Arts and Humanities Research Council (referencia AH/V012134/1) por la financiación de la renovación del laboratorio científico del V&A, incluida la adquisición del espectrómetro M6 Jetstream utilizado para los experimentos de cartografía elemental por FRX; de la cámara de IR Apollo utilizada para los experimentos de reflectografía infrarroja; y del microscopio digital Hirox HRX-01 utilizado para la microscopía digital.

**Conflictos de intereses:** Los autores declaran no tener ningún conflicto de intereses.

## Notas

1. Puede parecer contraintuitivo que el cloruro de plata como producto de corrosión aparezca oscuro, cuando el material puro, considerado a granel, es blanco. Sin embargo, son muchos los fenómenos que se producen cuando se forman productos de corrosión en la superficie de los metales. La combinación de estos fenómenos cambia el aspecto de las superficies deterioradas a simple vista. Entre estos fenómenos podemos mencionar la interferencia por película fina, la naturaleza amorfa del producto de corrosión y la posible presencia simultánea de óxido de plata, que suele aparecer de color marrón-negro, o de otros productos de corrosión.

## Referencias

- Newman, R., E. Kaplan, and M.C. Álvarez-White, *The Story of Elaeagia Resin (Mopa-Mopa), So Far*. Heritage, 2023. 6(5): p. 4320-4344. <https://doi.org/10.3390/heritage6050229>
- Álvarez-White, M.C., D. Cohen, and M.O. Fernández, *The Splendour of Glitter: Silver Leaf in barniz de Pasto Objects*. Heritage, 2023. 6(10): p. 6581-6595. <https://doi.org/10.3390/heritage6100344>
- Pozzi, F., E. Basso, and M. Katz, *In search of Humboldt's colors: materials and techniques of a 17th-century lacquered gourd from Colombia*. Heritage Science, 2020. 8: p. 1-16. <https://doi.org/10.1186/s40494-020-00449-1>
- Schedule of Articles marked EB in Inventory of Contents of Batemans 1939*: The National Trust. p. 1.
- Bateman's*. 1985: The National Trust: The Stellar Press.
- Bateman's*. 1989: The National Trust: BAS Printers Limited.
- Bateman's*. 1991: The National Trust: BAS Printers Limited.
- Bateman's*. 1993: The National Trust: BAS Printers Limited.
- Bateman's*. 1995: The National Trust: BAS Printers Limited.
- Kipling, R., *The Letters of Rudyard Kipling*. Vol. 5. 1990: University of Iowa Press.
- An oak day-bed designed by Rudyard Kipling and made by Leslie Cope Cornford (1867-1927) in 1902*. [accessed 27 July 2023]; Available from: <https://www.nationaltrustcollections.org.uk/object/760885>.
- Kipling, R., *Brazilian Sketches*. 2016: Canelo.
- Álvarez-White, M.C. *El barniz de Pasto: Reflejo de la naturaleza*. in *Naturaleza y Paisaje. X Encuentro Internacional sobre Barroco*. 2019. Fundación Visión Cultural.
- Cabeza, R.M.C., *Entre el Viejo y el Nuevo Mundo: el escritorio de barniz de pasto de la colección de artes decorativas de The Hispanic Society of America*. Res Mobilis, 2014. 3(3): p. 119-131.
- Álvarez-White, M.C., *El barniz de Pasto: secretos y revelaciones*. 2023: Universidad de los Andes.
- Geminiani, L., V. Risdonne, and L. Burgio, *V&A internal analysis report 23-24-LG-VR-LB Analysis of National Trust Casket NT760886*. 2023.
- Cabinet*. [accessed 9 December 2023]; Available from: <https://collections.vam.ac.uk/item/O1296371/cabinet-unknown/>
- Humphrey, N., L. Burgio, and D. Melchar. *One small corner of the Viceroyalty in South Kensington: barniz de Pasto at the Victoria and Albert Museum, London*. in *Anales del Museo de América*. 2020. Subdirección General de Documentación y Publicaciones.
- Hoadley, R.B., *Understanding wood: a craftsman's guide to wood technology*. 2000: Taunton press.
- Bratasz, Ł., *Allowable microclimatic variations for painted wood*. Studies in Conservation, 2013. 58(2): p. 65-79. <https://doi.org/10.1179/2047058412Y.00000000061>
- Jakiela, S., Ł. Bratasz, and R. Kozłowski, *Numerical modelling of moisture movement and related stress field in lime wood subjected to changing climate conditions*. Wood Science and Technology, 2008. 42: p. 21-37. <https://doi.org/10.1007/s00226-007-0138-5>
- Historia del Reino de Quito en la América Meridional*. Tomo 1, year 1789, Quito. Vol. 1. 1844: Imprenta del Gobierno.
- Keune, K. and J.J. Boon, *Analytical imaging studies of cross-sections of paintings affected by lead soap aggregate formation*. Studies in conservation, 2007. 52(3): p. 161-176. <https://doi.org/10.1179/sic.2007.52.3.161>
- Lead soaps*. [accessed 9 December 2023]; Available from: <https://www.metmuseum.org/about-the-met/conservation-and-scientific-research/projects/lead-soaps>.
- Casadio, F., et al., *Metal soaps in art*. 2019: Springer.
- Centeno, S.A. and D. Mahon, *The chemistry of aging in oil paintings: metal soaps and visual changes*. The Metropolitan Museum of Art Bulletin, 2009. 67(1): p. 12-19. <https://www.jstor.org/stable/40588562>
- Higgitt, C., M. Spring, and D. Saunders, *Pigment-medium interactions in oil paint films containing red lead or lead-tin yellow*. National Gallery Technical Bulletin, 2003. 24: p. 75-95.
- Burgio, L., et al., *Identification, characterisation and mapping of calomel as 'mercury white', a previously undocumented pigment from South America, and its use on a barniz de Pasto cabinet at the Victoria and Albert Museum*. Microchemical Journal, 2018. 143: p. 220-227. <https://doi.org/10.1016/j.microc.2018.08.010>
- Melchar, D., et al. *A collaborative, multidisciplinary and multi-analytical approach to the characterisation of barniz de Pasto objects from the V&A collections*. in *Transcending Boundaries: Integrated Approaches to Conservation*. ICOM-CC 19th Triennial Conference Preprints (Beijing, 17-21 May 2021). Paris: International Council of Museums. 2021.
- Burgio, L. *Mercury white': a rare artists' pigment?* [accessed 9 December 2023]; Available from: <https://www.vam.ac.uk/blog/caring-for-our-collections/mercury-white-a-rare-artists-pigment>.
- Ledesma, A.S. *Análisis de los materiales de una arqueta decorada con barniz de Pasto, perteneciente a la colección del Museo de América de Madrid*. in *Anales del Museo de América*. 2020. Subdirección General de Documentación y Publicaciones.
- Casket, W.7-2018*. [accessed 31 January 2024]; Available from: <https://collections.vam.ac.uk/item/O1438719/casket/>.
- Ricciardi, P. and C. Schmidt Patterson, *Science of the book: analytical methods for the study of illuminated manuscripts*. A handbook of the art and science of illuminated manuscripts. London and Turnhout: Harvey Miller/Brepols, 2020: p. 51-87.
- Villanueva, A.A. *Arquetas de barniz de Pasto en la catedral de Pamplona. Estudio y tratamiento*. in *Anales del Museo de América*. 2020. Subdirección General de Documentación y Publicaciones.
- Kingsland, L.F., *Wood Preservation*. The Forestry Chronicle, 1956. 32(4): p. 411-416.



---

**Descargo de responsabilidad/Nota del editor:** Las declaraciones, opiniones y datos contenidos en todas las publicaciones son responsabilidad exclusiva de los autores y colaboradores individuales y no de MDPI y/o el/los editor/es. MDPI y/o el/los editor/es declinan toda responsabilidad por daños personales o materiales derivados de ideas, métodos, instrucciones o productos a los que se haga referencia en el contenido.
